# Supplementary material for: The electronic stability of tin-halide perovskite charged regions
Source: Royal Society of Chemistry journal article supplement (doi:10.1039/d1ma01232k), 2022-01-01
Supplement: d1ma01232k1.pdf [file d1ma01232k1.pdf]

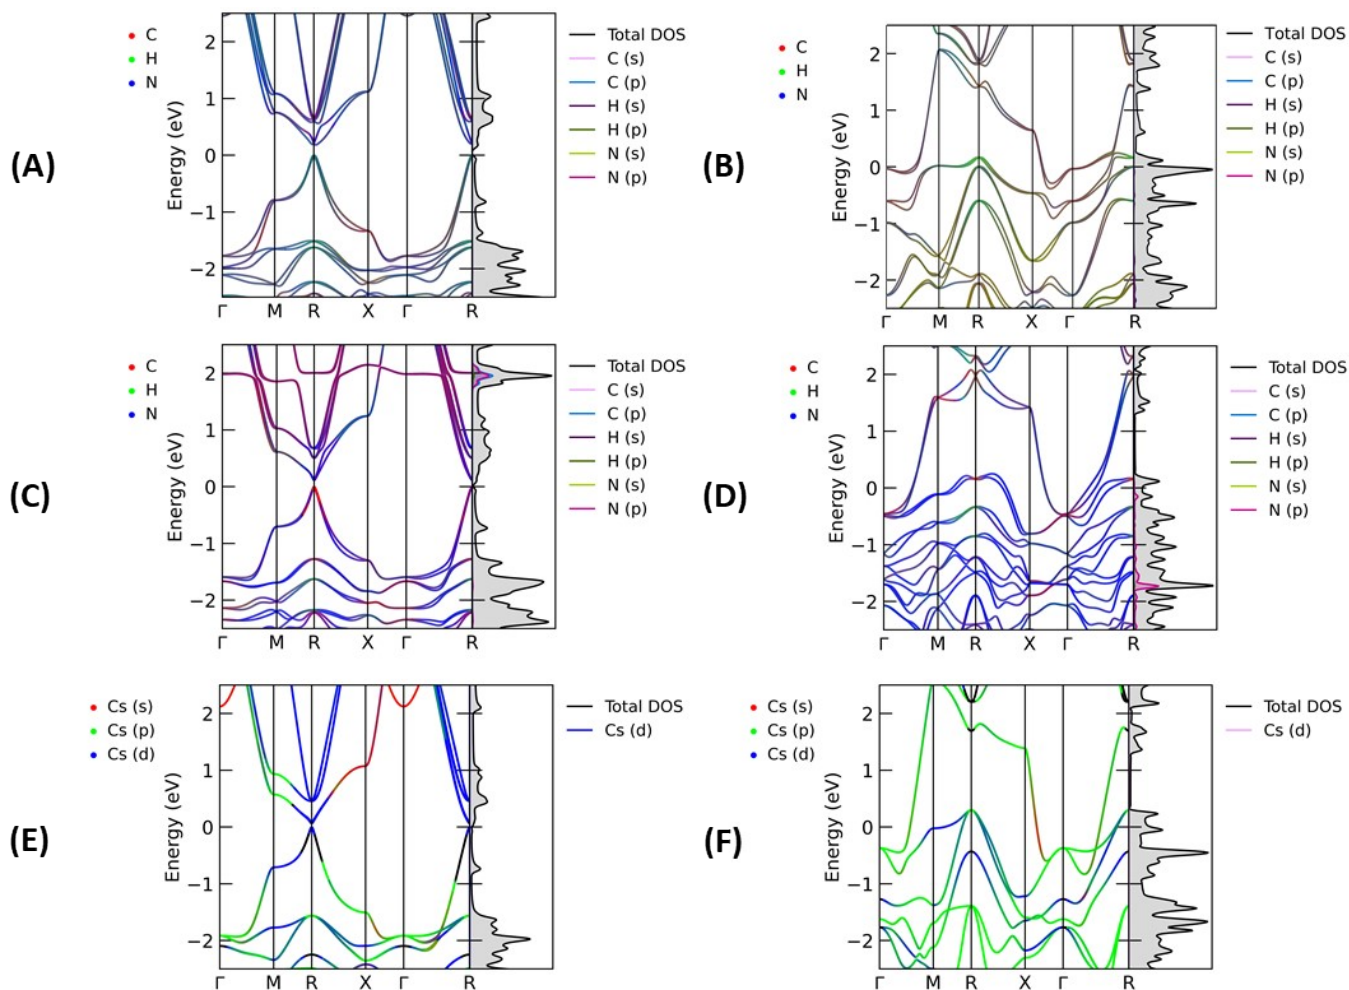

**Figure S1.** Band structure and density of states plots for (A) MASnI<sub>3</sub>, (B) [MASnI<sub>3</sub>]<sup>2+</sup>, (C) FASnI<sub>3</sub>, (D) [FASnI<sub>3</sub>]<sup>2+</sup>, (E) CsSnI<sub>3</sub> and (F) [CsSnI<sub>3</sub>]<sup>2+</sup>, orbital projections highlighting C, H and N or Cs s, Cs p and Cs d are shown on the band structure plot according to the key in the top left of each plot, and partial density of states projections for C, N and H or Cs are shown in the key in the top right of each plot. All energies are relative to the Fermi energy ( $E_F$ ).

**Table S1.** Comparison of initial valence electrons per element and system.

| Atom/Ion                            | No. of Valence Electrons | Valence Orbitals of Atoms |
|-------------------------------------|--------------------------|---------------------------|
| Sn                                  | 14                       | $5d^{10} 6s^2 6p^2$       |
| I                                   | 7                        | $5s^2 5p^5$               |
| C                                   | 4                        | $2s^2 2p^2$               |
| H                                   | 1                        | $1s^1$                    |
| N                                   | 5                        | $2s^2 2p^3$               |
| Cs                                  | 9                        | $5s^2 5p^6 6s^1$          |
| MASnI <sub>3</sub>                  | 50                       | -                         |
| [MASnI <sub>3</sub> ] <sup>2+</sup> | 48                       | -                         |
| FASnI <sub>3</sub>                  | 54                       | -                         |
| [FASnI <sub>3</sub> ] <sup>2+</sup> | 52                       | -                         |
| CsSnI <sub>3</sub>                  | 44                       | -                         |
| [CsSnI <sub>3</sub> ] <sup>2+</sup> | 42                       | -                         |

**Table S2.** Comparison of bond angles and lengths in relaxed  $\text{MASnI}_3$  and  $[\text{MASnI}_3]^{2+}$ 

| Criteria                                            | $\text{MASnI}_3$ | $[\text{MASnI}_3]^{2+}$ |
|-----------------------------------------------------|------------------|-------------------------|
| I1-Sn-I1 bond angle                                 | 171.51 °         | 164.32 °                |
| I2-Sn-I2 bond angle                                 | 174.11 °         | 159.95 °                |
| I3-Sn-I3 bond angle                                 | 172.09 °         | 164.36 °                |
| Mean Sn-I bond length                               | 3.13 Å           | 2.65 Å                  |
| Mean Sn-I bond length standard deviation            | 0.09 Å           | 0.09 Å                  |
| Average lattice parameter to Sn-I bond length ratio | 1.99             | 1.98                    |
| MA-SnI <sub>6</sub> octahedra bond length           | 5.24 Å           | 4.56 Å                  |
| C-N bond length                                     | 1.49 Å           | 1.45 Å                  |
| Mean C-H bond length                                | 1.09 Å           | 1.09 Å                  |
| Mean C-H bond length standard deviation             | <0.01 Å          | <0.01 Å                 |
| Mean N-H bond length                                | 1.04 Å           | 1.03                    |
| Mean N-H bond length standard deviation             | <0.01 Å          | <0.01 Å                 |

**Table S3.** Comparison of bond angles and lengths in relaxed FASnI<sub>3</sub> and [FASnI<sub>3</sub>]<sup>2+</sup>

| Criteria                                            | FASnI <sub>3</sub> | [FASnI <sub>3</sub> ] <sup>2+</sup> |
|-----------------------------------------------------|--------------------|-------------------------------------|
| I1-Sn-I1 bond angle                                 | 170.69°            | 157.78°                             |
| I2-Sn-I2 bond angle                                 | 175.50°            | 179.93°                             |
| I3-Sn-I3 bond angle                                 | 169.12°            | 164.47°                             |
| Mean Sn-I bond length                               | 3.31 Å             | 2.69 Å                              |
| Mean Sn-I bond length standard deviation            | 0.08 Å             | 0.04 Å                              |
| Average lattice parameter to Sn-I bond length ratio | 2.00               | 1.98                                |
| FA-SnI <sub>6</sub> octahedra bond length           | 5.50 Å             | 4.75 Å                              |
| Mean C-N bond length                                | 1.31 Å             | 1.29 Å                              |
| N-C-N bond angle                                    | 124.92°            | 116.46°                             |
| C-H bond length                                     | 1.09 Å             | 1.09 Å                              |
| Mean N-H bond length                                | 1.02 Å             | 1.01                                |
| Mean N-H bond length standard deviation             | <0.01 Å            | <0.01 Å                             |

**Table S4.** Comparison of bond angles and lengths in relaxed CsSnI<sub>3</sub> and [CsSnI<sub>3</sub>]<sup>2+</sup>

| Criteria                                            | CsSnI <sub>3</sub> | [CsSnI <sub>3</sub> ] <sup>2+</sup> |
|-----------------------------------------------------|--------------------|-------------------------------------|
| I1-Sn-I1 bond angle                                 | 180.00°            | 180.00°                             |
| I2-Sn-I2 bond angle                                 | 180.00°            | 180.00°                             |
| I3-Sn-I3 bond angle                                 | 180.00°            | 180.00°                             |
| Mean Sn-I bond length                               | 3.10 Å             | 2.58 Å                              |
| Mean Sn-I bond length standard deviation            | <0.01 Å            | <0.01 Å                             |
| Average lattice parameter to Sn-I bond length ratio | 2.00               | 2.00                                |
| Cs-SnI <sub>3</sub> octahedra bond length           | 5.38 Å             | 4.46 Å                              |

**Table S5.** Comparison of Bader valence charge for atoms in  $\text{MASnI}_3$  and  $[\text{MASnI}_3]^{2+}$ , the difference in the Bader charge for the H atoms is due to the hydrogen bonding with Iodine, in this case reduces the Bader charge of H atoms that are bonded with N.

| Atom          | $\text{MASnI}_3$ Bader Charge | $[\text{MASnI}_3]^{2+}$ Bader Charge | Difference |
|---------------|-------------------------------|--------------------------------------|------------|
| $\text{Sn}_1$ | 13.18                         | 12.84                                | -0.34      |
| $\text{I}_1$  | 7.53                          | 6.97                                 | -0.56      |
| $\text{I}_2$  | 7.52                          | 6.96                                 | -0.56      |
| $\text{I}_3$  | 7.52                          | 6.98                                 | -0.54      |
| $\text{N}_1$  | 6.14                          | 6.09                                 | -0.05      |
| $\text{C}_1$  | 3.88                          | 3.70                                 | -0.18      |
| $\text{H}_1$  | 0.51                          | 0.56                                 | +0.05      |
| $\text{H}_2$  | 0.51                          | 0.55                                 | +0.04      |
| $\text{H}_3$  | 0.89                          | 0.94                                 | +0.05      |
| $\text{H}_4$  | 0.89                          | 0.94                                 | +0.05      |
| $\text{H}_5$  | 0.88                          | 0.92                                 | +0.04      |
| $\text{H}_6$  | 0.53                          | 0.54                                 | +0.01      |

**Table S6.** Comparison of Bader valence charge for atoms in FASnI<sub>3</sub> and [FASnI<sub>3</sub>]<sup>2+</sup>, the difference in the Bader charge for the H atoms is due to the hydrogen bonding with Iodine, in this case reduces the Bader charge of H atoms that are bonded with N.

| Atom            | FASnI <sub>3</sub> Bader Charge | [FASnI <sub>3</sub> ] <sup>2+</sup> Bader Charge | Difference |
|-----------------|---------------------------------|--------------------------------------------------|------------|
| Sn <sub>1</sub> | 13.15                           | 12.77                                            | -0.38      |
| I <sub>1</sub>  | 7.53                            | 7.00                                             | -0.53      |
| I <sub>2</sub>  | 7.54                            | 6.93                                             | -0.61      |
| I <sub>3</sub>  | 7.53                            | 7.09                                             | -0.44      |
| N <sub>1</sub>  | 6.25                            | 6.22                                             | -0.03      |
| N <sub>2</sub>  | 6.30                            | 6.22                                             | -0.08      |
| C <sub>1</sub>  | 2.81                            | 2.66                                             | -0.15      |
| H <sub>1</sub>  | 0.81                            | 0.84                                             | +0.03      |
| H <sub>2</sub>  | 0.53                            | 0.55                                             | +0.02      |
| H <sub>3</sub>  | 0.53                            | 0.56                                             | +0.03      |
| H <sub>4</sub>  | 0.53                            | 0.56                                             | +0.03      |
| H <sub>5</sub>  | 0.48                            | 0.56                                             | +0.08      |

**Table S7.** Comparison of Bader valence charge for atoms in CsSnI<sub>3</sub> and [CsSnI<sub>3</sub>]<sup>2+</sup>

| Atom            | CsSnI <sub>3</sub> Bader Charge | [CsSnI <sub>3</sub> ] <sup>2+</sup> Bader Charge | Difference |
|-----------------|---------------------------------|--------------------------------------------------|------------|
| Sn <sub>1</sub> | 13.16                           | 12.80                                            | -0.36      |
| I <sub>1</sub>  | 7.58                            | 7.03                                             | -0.55      |
| I <sub>2</sub>  | 7.58                            | 7.01                                             | -0.57      |
| I <sub>3</sub>  | 7.53                            | 6.99                                             | -0.54      |
| Cs <sub>1</sub> | 8.14                            | 8.16                                             | +0.02      |



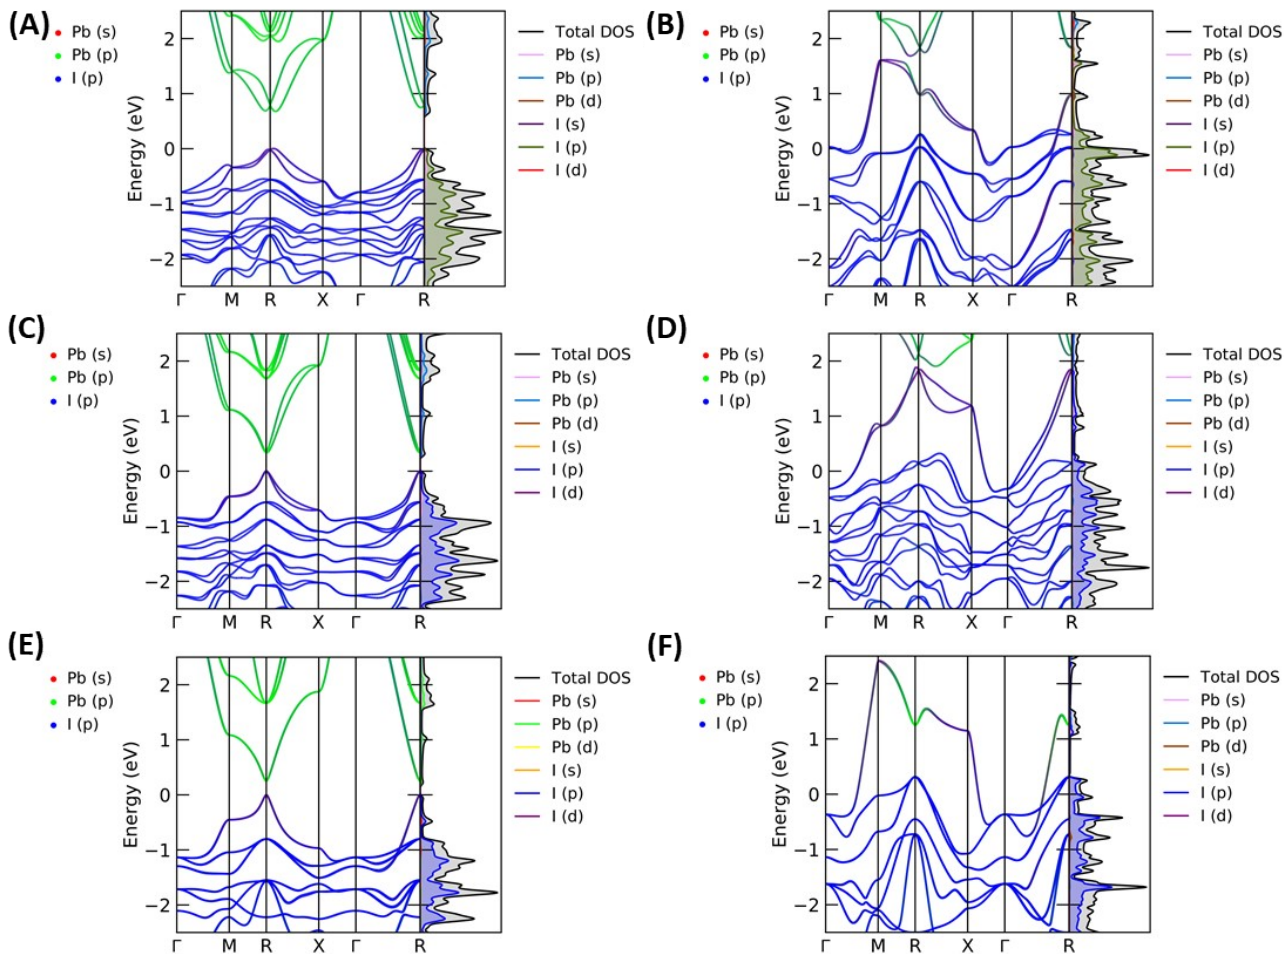

**Figure S2.** Band structure and density of states plots for (A) MAPbI<sub>3</sub>, (B) [MAPbI<sub>3</sub>]<sup>2+</sup>, (C) FAPbI<sub>3</sub>, (D) [FAPbI<sub>3</sub>]<sup>2+</sup>, (E) CsPbI<sub>3</sub> and (F) [CsPbI<sub>3</sub>]<sup>2+</sup>, orbital projections highlighting Sn s, Sn p and I p are shown on the band structure plot according to the key in the top left of each plot, and partial density of states projections for Sn and I are shown in the key in the top right of each plot. All energies are relative to the Fermi energy ( $E_F$ ).

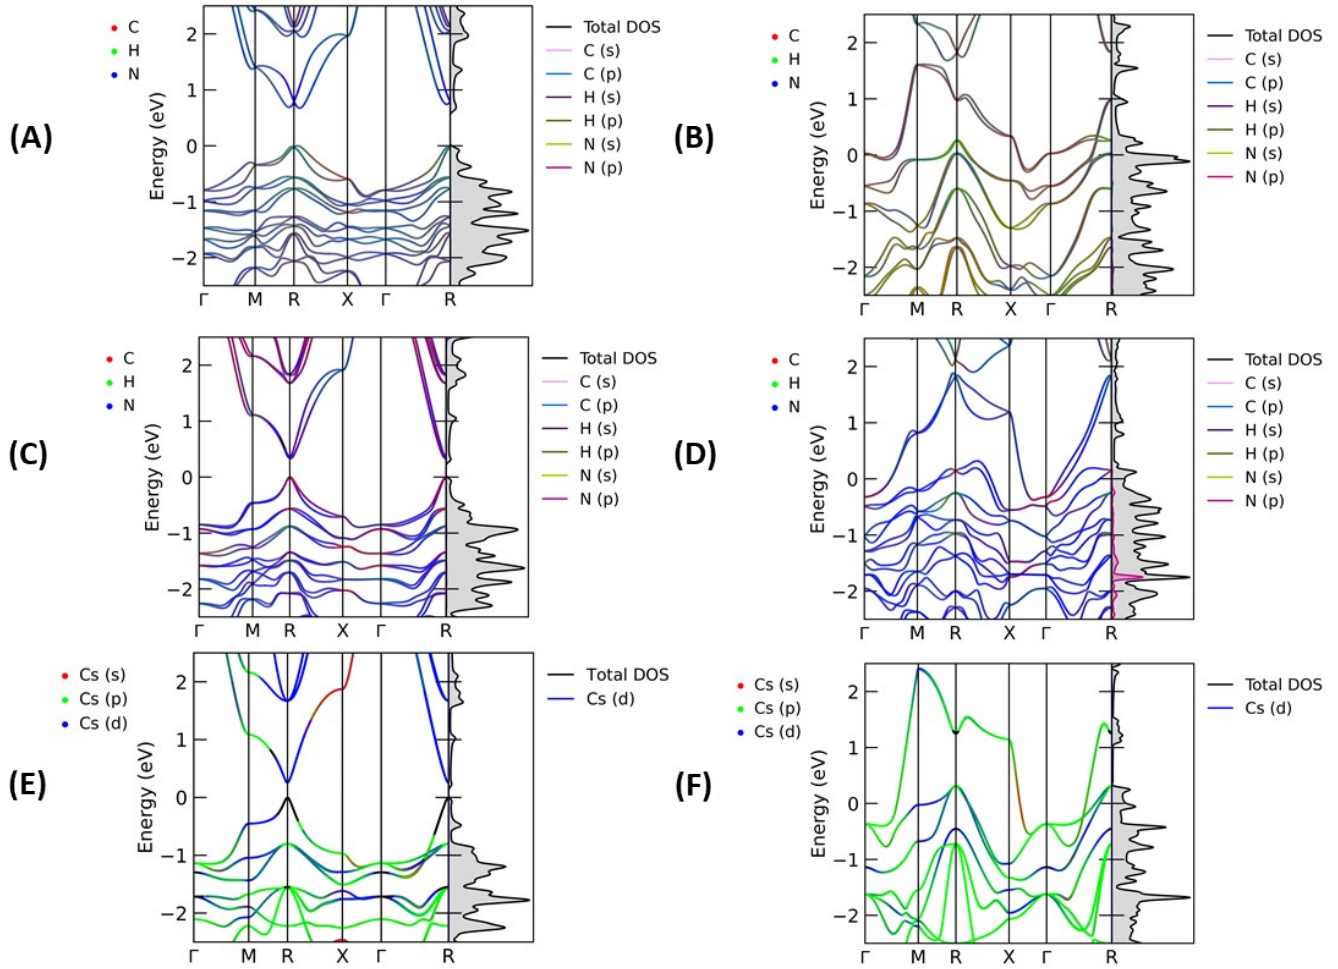

**Figure S3.** Band structure and density of states plots for (A) MAPbI<sub>3</sub>, (B) [MAPbI<sub>3</sub>]<sup>2+</sup>, (C) FAPbI<sub>3</sub>, (D) [FAPbI<sub>3</sub>]<sup>2+</sup>, (E) CsPbI<sub>3</sub> and (F) [CsPbI<sub>3</sub>]<sup>2+</sup>, orbital projections highlighting C, H and N or Cs s, Cs p and Cs d are shown on the band structure plot according to the key in the top left of each plot, and partial density of states projections for C, N and H or Cs are shown in the key in the top right of each plot. All energies are relative to the Fermi energy ( $E_F$ ).

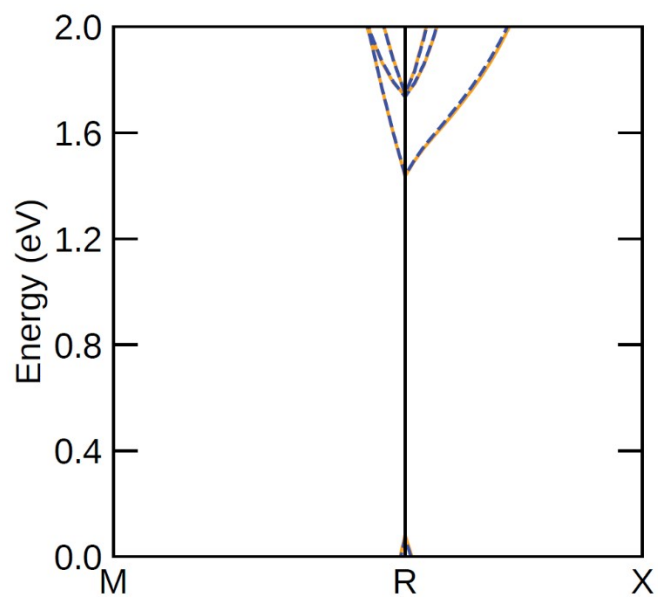

**Figure S4.** HSE06 Band Structure for MAPbI<sub>3</sub> using a k-point mesh of 4x4x4, showing a direct band gap of 1.36 eV at the R specific point.

**Table S8.** Comparison of lattice parameters and volume for MAPbI<sub>3</sub>, [MAPbI<sub>3</sub>]<sup>2+</sup>, FAPbI<sub>3</sub>, [FAPbI<sub>3</sub>]<sup>2+</sup>, CsPbI<sub>3</sub> and [CsPbI<sub>3</sub>]<sup>2+</sup>.

| Material                            | a (Å) | b (Å) | c (Å) | $\alpha(\theta)$ | $\beta(\theta)$ | $\gamma(\theta)$ | Unit Cell Volume (Å <sup>3</sup> ) |
|-------------------------------------|-------|-------|-------|------------------|-----------------|------------------|------------------------------------|
| MAPbI <sub>3</sub>                  | 6.20  | 6.31  | 6.37  | 84.96°           | 88.17°          | 91.70°           | 247.94                             |
| [MAPbI <sub>3</sub> ] <sup>2+</sup> | 5.33  | 5.34  | 5.33  | 82.62°           | 84.12°          | 82.05°           | 148.42                             |
| FAPbI <sub>3</sub>                  | 6.43  | 6.28  | 6.32  | 90.06°           | 90.00°          | 90.00°           | 255.34                             |
| [FAPbI <sub>3</sub> ] <sup>2+</sup> | 5.32  | 5.56  | 5.34  | 90.01°           | 90.00°          | 90.03°           | 157.75                             |
| CsPbI <sub>3</sub>                  | 6.31  | 6.31  | 6.31  | 90.00°           | 90.00°          | 90.00°           | 250.99                             |
| [CsPbI <sub>3</sub> ] <sup>2+</sup> | 5.24  | 5.24  | 5.24  | 90.00°           | 90.00°          | 90.00°           | 144.29                             |

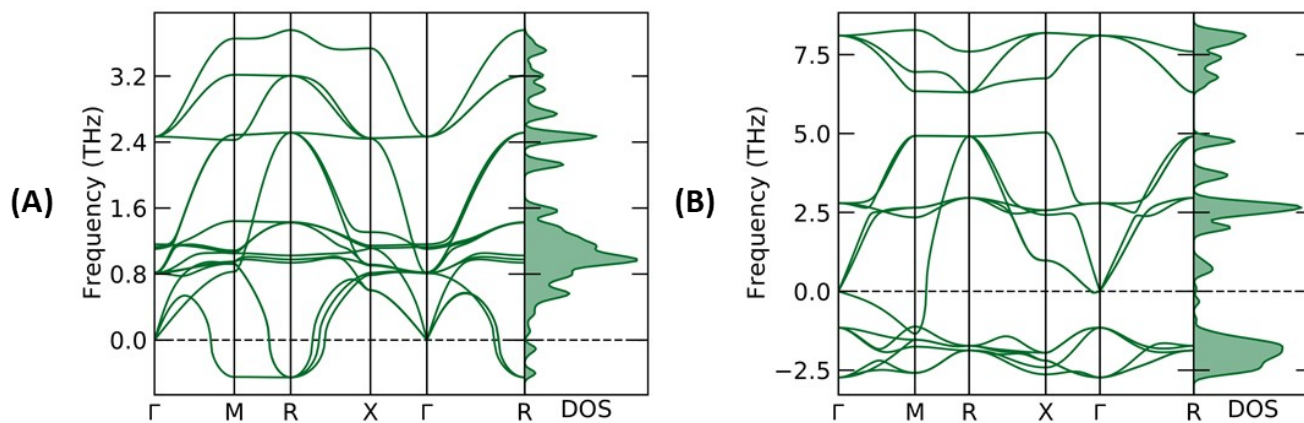

**Figure S5.** Phonon band structure and density of states for (A) CsPbI<sub>3</sub> and (B) [CsPbI<sub>3</sub>]<sup>2+</sup>. Negative frequencies are shown in the case of [CsPbI<sub>3</sub>]<sup>2+</sup>, indicating instability, whereas CsPbI<sub>3</sub> contains only positive frequencies.

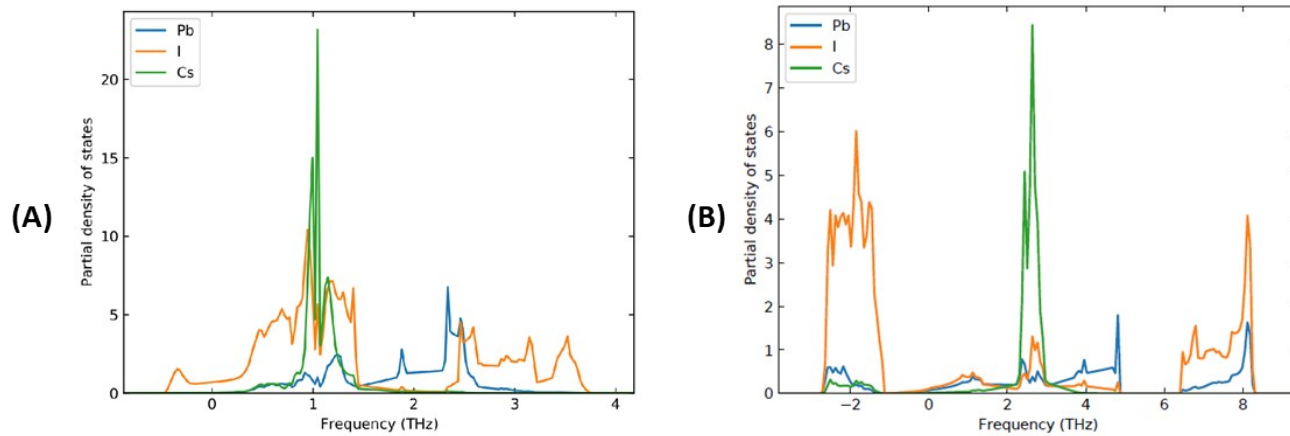

**Figure S6.** Phonon partial density of states for (A) CsPbI<sub>3</sub> and (B) [CsPbI<sub>3</sub>]<sup>2+</sup> where each element is labelled in the top left. Negative frequencies are shown in the case of [CsPbI<sub>3</sub>]<sup>2+</sup>, indicating instability, whereas CsSnI<sub>3</sub> contains only positive frequencies.

**Table S9.** Comparison of Bader valence charge for atoms in MAPbI<sub>3</sub> and [MAPbI<sub>3</sub>]<sup>2+</sup>

| Atom            | MAPbI <sub>3</sub> Bader Charge | [MAPbI <sub>3</sub> ] <sup>2+</sup> Bader Charge | Difference |
|-----------------|---------------------------------|--------------------------------------------------|------------|
| Pb <sub>1</sub> | 13.16                           | 13.17                                            | +0.01      |
| I <sub>1</sub>  | 7.53                            | 6.89                                             | -0.64      |
| I <sub>2</sub>  | 7.53                            | 6.87                                             | -0.66      |
| I <sub>3</sub>  | 7.54                            | 6.84                                             | -0.70      |
| N <sub>1</sub>  | 6.10                            | 6.05                                             | -0.05      |
| C <sub>1</sub>  | 3.91                            | 3.73                                             | -0.18      |
| H <sub>1</sub>  | 0.55                            | 0.56                                             | +0.01      |
| H <sub>2</sub>  | 0.52                            | 0.55                                             | +0.03      |
| H <sub>3</sub>  | 0.87                            | 0.94                                             | +0.07      |
| H <sub>4</sub>  | 0.88                            | 0.92                                             | +0.04      |
| H <sub>5</sub>  | 0.87                            | 0.92                                             | +0.05      |
| H <sub>6</sub>  | 0.54                            | 0.57                                             | +0.03      |

**Table S10. Comparison of Bader valence charge for atoms in FAPbI<sub>3</sub> and [FAPbI<sub>3</sub>]<sup>2+</sup>**

| Atom            | FAPbI <sub>3</sub> Bader Charge | [FAPbI <sub>3</sub> ] <sup>2+</sup> Bader Charge | Difference |
|-----------------|---------------------------------|--------------------------------------------------|------------|
| Pb <sub>1</sub> | 13.18                           | 13.07                                            | -0.11      |
| I <sub>1</sub>  | 7.53                            | 6.85                                             | -0.68      |
| I <sub>2</sub>  | 7.51                            | 6.84                                             | -0.67      |
| I <sub>3</sub>  | 7.54                            | 7.02                                             | -0.52      |
| N <sub>1</sub>  | 6.25                            | 6.21                                             | -0.04      |
| N <sub>2</sub>  | 6.25                            | 6.22                                             | -0.03      |
| C <sub>1</sub>  | 2.77                            | 2.72                                             | -0.05      |
| H <sub>1</sub>  | 0.87                            | 0.84                                             | -0.03      |
| H <sub>2</sub>  | 0.52                            | 0.57                                             | +0.05      |
| H <sub>3</sub>  | 0.52                            | 0.55                                             | +0.03      |
| H <sub>4</sub>  | 0.52                            | 0.55                                             | +0.03      |
| H <sub>5</sub>  | 0.52                            | 0.55                                             | +0.03      |



**Table S11. Comparison of Bader valence charge for atoms in CsPbI<sub>3</sub> and [CsPbI<sub>3</sub>]<sup>2+</sup>**

| Atom            | CsPbI <sub>3</sub> Bader Charge | [CsPbI <sub>3</sub> ] <sup>2+</sup> Bader Charge | Difference |
|-----------------|---------------------------------|--------------------------------------------------|------------|
| Pb <sub>1</sub> | 13.21                           | 13.17                                            | -0.04      |
| I <sub>1</sub>  | 7.54                            | 6.92                                             | -0.62      |
| I <sub>2</sub>  | 7.54                            | 6.88                                             | -0.66      |
| I <sub>3</sub>  | 7.54                            | 6.88                                             | -0.66      |
| Cs <sub>1</sub> | 8.16                            | 8.15                                             | -0.01      |

**Data S1-12. (separate files)**

Collection of relaxed unit cell in VASP (POSCAR/CONTCAR) and .cif format attached.
